# Supplementary material for: The Faculty Self-Reported Assessment Survey (FRAS): Differentiating Faculty Knowledge and Experience in Assessment
Source: Atypon-hosted journal article supplement (doi:10.1187/cbe.14-10-0169), 2015-06-01
Supplement: combinedsupmats.pdf [file combinedsupmats.pdf]

CORRECTED

# **Supplemental Material**

*CBE—Life Sciences Education*

*Hanauer et al.*

**Appendix One: The Faculty Self-Reported Assessment Survey (FRAS)**

|                                  | I have never heard this term before | I have heard this term before but do not know what it means | I have heard this term before but am not confident I know what it means | I have heard this term before and have a sense of what it means | I am completely familiar with this term and know what it means |
|----------------------------------|-------------------------------------|-------------------------------------------------------------|-------------------------------------------------------------------------|-----------------------------------------------------------------|----------------------------------------------------------------|
| <i>Assessment program</i>        |                                     |                                                             |                                                                         |                                                                 |                                                                |
| <i>Student learning outcomes</i> |                                     |                                                             |                                                                         |                                                                 |                                                                |
| <i>Student competencies</i>      |                                     |                                                             |                                                                         |                                                                 |                                                                |
| <i>Formative assessment</i>      |                                     |                                                             |                                                                         |                                                                 |                                                                |
| <i>Summative assessment</i>      |                                     |                                                             |                                                                         |                                                                 |                                                                |
| <i>Portfolio</i>                 |                                     |                                                             |                                                                         |                                                                 |                                                                |
| <i>Assessment task</i>           |                                     |                                                             |                                                                         |                                                                 |                                                                |
| <i>Performance assessment</i>    |                                     |                                                             |                                                                         |                                                                 |                                                                |
| <i>Authentic assessment</i>      |                                     |                                                             |                                                                         |                                                                 |                                                                |
| <i>Alternative assessment</i>    |                                     |                                                             |                                                                         |                                                                 |                                                                |
| <i>Problem Solving Questions</i> |                                     |                                                             |                                                                         |                                                                 |                                                                |
| <i>Scenario Questions</i>        |                                     |                                                             |                                                                         |                                                                 |                                                                |
| <i>Rubrics</i>                   |                                     |                                                             |                                                                         |                                                                 |                                                                |
| <i>Analytic scales</i>           |                                     |                                                             |                                                                         |                                                                 |                                                                |
| <i>Holistic scales</i>           |                                     |                                                             |                                                                         |                                                                 |                                                                |
| <i>Assessment validity</i>       |                                     |                                                             |                                                                         |                                                                 |                                                                |
| <i>Item discrimination</i>       |                                     |                                                             |                                                                         |                                                                 |                                                                |
| <i>Assessment reliability</i>    |                                     |                                                             |                                                                         |                                                                 |                                                                |
| <i>Content validity</i>          |                                     |                                                             |                                                                         |                                                                 |                                                                |
| <i>Item difficulty</i>           |                                     |                                                             |                                                                         |                                                                 |                                                                |
| <i>Inter-rater reliability</i>   |                                     |                                                             |                                                                         |                                                                 |                                                                |
| <i>Intra-rater reliability</i>   |                                     |                                                             |                                                                         |                                                                 |                                                                |
| <i>Test-retest reliability</i>   |                                     |                                                             |                                                                         |                                                                 |                                                                |
| <i>Internal consistency</i>      |                                     |                                                             |                                                                         |                                                                 |                                                                |
|                                  | <b>Never</b>                        | <b>Rarely</b>                                               | <b>Sometimes</b>                                                        | <b>Often</b>                                                    | <b>All of the Time</b>                                         |
| <i>I have constructed</i>        |                                     |                                                             |                                                                         |                                                                 |                                                                |

|                                                                                                |                          |                 |                                   |              |                       |
|------------------------------------------------------------------------------------------------|--------------------------|-----------------|-----------------------------------|--------------|-----------------------|
| <i>an assessment plan for my course</i>                                                        |                          |                 |                                   |              |                       |
| <i>I have defined student learning outcomes for my course</i>                                  |                          |                 |                                   |              |                       |
| <i>I have written formative assessments</i>                                                    |                          |                 |                                   |              |                       |
| <i>I have written summative assessments</i>                                                    |                          |                 |                                   |              |                       |
| <i>I have provided feedback to students based on formative assessments</i>                     |                          |                 |                                   |              |                       |
| <i>I have provided feedback to students based on summative assessments</i>                     |                          |                 |                                   |              |                       |
| <i>I have written a report based on assessment data</i>                                        |                          |                 |                                   |              |                       |
|                                                                                                | <b>Strongly Disagree</b> | <b>Disagree</b> | <b>Neither Agree nor Disagree</b> | <b>Agree</b> | <b>Strongly Agree</b> |
| <i>I am confident in my ability to define the important components of my course</i>            |                          |                 |                                   |              |                       |
| <i>I am confident in my ability to define my course in terms of student learning outcomes</i>  |                          |                 |                                   |              |                       |
| <i>I am confident in my ability to design formative assessments</i>                            |                          |                 |                                   |              |                       |
| <i>I am confident in my ability to evaluate the quality of the assessments I have designed</i> |                          |                 |                                   |              |                       |
| <i>I am confident in my ability to analyze the formative assessments I have designed</i>       |                          |                 |                                   |              |                       |
| <i>I am confident in</i>                                                                       |                          |                 |                                   |              |                       |

|                                                                                                                                    |                           |                 |                |                 |                           |
|------------------------------------------------------------------------------------------------------------------------------------|---------------------------|-----------------|----------------|-----------------|---------------------------|
| <i>my ability to analyze the summative assessments I have designed</i>                                                             |                           |                 |                |                 |                           |
| <i>I am confident in my ability to provide students with relevant feedback based on the formative assessments I have designed.</i> |                           |                 |                |                 |                           |
| <i>I am confident in my ability to explain to specific students the outcomes of their summative assessment performance</i>         |                           |                 |                |                 |                           |
| <i>I am confident in my ability to report assessment outcomes to administrators</i>                                                |                           |                 |                |                 |                           |
| <i>I am confident that my assessments accurately reflect the teaching objectives of my course</i>                                  |                           |                 |                |                 |                           |
| <i>Overall I am confident in my abilities to appropriately assess my course and my students</i>                                    |                           |                 |                |                 |                           |
|                                                                                                                                    | <b>Extremely Negative</b> | <b>Negative</b> | <b>Neutral</b> | <b>Positive</b> | <b>Extremely Positive</b> |
| <i>How do you feel about using assessment in your course</i>                                                                       |                           |                 |                |                 |                           |
| <i>How do you feel about reporting to faculty on assessment of your class</i>                                                      |                           |                 |                |                 |                           |
| <i>How do you feel about reporting to administration on assessments of your class</i>                                              |                           |                 |                |                 |                           |
| <i>How do you feel about providing feedback to your students based on</i>                                                          |                           |                 |                |                 |                           |

|                                                                                                           |  |  |  |  |  |
|-----------------------------------------------------------------------------------------------------------|--|--|--|--|--|
| <i>formative<br/>assessment</i>                                                                           |  |  |  |  |  |
| <i>How do you feel<br/>about providing<br/>feedback to students<br/>based on summative<br/>assessment</i> |  |  |  |  |  |

**Appendix Table A.** Statistical indicators for data set corresponding to Figure 1 in Hanauer & Bauerle, 2014. Mean, Standard Deviation (S.D.) and significance values for faculty responses to *Frequency of Assessment* queries; median, range (R) and interquartile range (IQR) values are also included for Advanced (n = 11) and Novice (n = 17) responses.

| Frequency of Assessment Activity                                    | Mean (S.D.) |             | Mann-Whitney U Test | Two-tailed Sig. | Median (IQR, R) |          |
|---------------------------------------------------------------------|-------------|-------------|---------------------|-----------------|-----------------|----------|
|                                                                     | Advanced    | Novice      |                     |                 | Advanced        | Novice   |
| I have constructed an assessment plan for my course                 | 4.18 (1.07) | 3.24 (1.3)  | 68.5**              | 0.01            | 5 (2, 3)        | 4 (2, 4) |
| I have defined student learning outcomes for my course              | 4.73 (0.46) | 2.29 (1.49) | 21**                | 0.001           | 5 (1, 1)        | 2 (3, 4) |
| I have written formative assessments                                | 4.55 (0.68) | 2.59 (1.41) | 48.5**              | 0.003           | 5 (1, 2)        | 2 (2, 4) |
| I have written summative assessments                                | 4.55 (0.68) | 2.59 (1.69) | 36.5**              | 0.001           | 5 (1, 2)        | 2 (3, 4) |
| I have provided feedback to students based on formative assessments | 4.64 (0.67) | 2.88 (1.86) | 48.5**              | 0.002           | 5 (1, 2)        | 4 (4, 4) |
| I have provided feedback to students based on summative assessments | 4.36 (0.92) | 2.59 (1.66) | 42**                | 0.001           | 5 (2, 2)        | 3 (3, 4) |
| I have written a report based on assessment data                    | 3.45 (1.57) | 2.65 (1.8)  | 96.5                | 0.3             | 4 (3, 4)        | 2 (4, 4) |

**Appendix Table B.** Statistical indicators for data set corresponding to Figure 1 in Hanauer & Bauerle, 2014. Mean, Standard Deviation (S.D.) and significance values for faculty responses to *Confidence in Assessment Ability* queries; median, range (R) and interquartile range (IQR) values are also included for Advanced (n = 11) and Novice (n = 17) responses.

| <b>Confidence in Assessment Ability</b>                                                        | <b>Mean (S.D.)</b> |             | <b>Mann-Whitney U Test</b> | <b>Two-tailed Sig.</b> | <b>Median (IQR, R)</b> |          |
|------------------------------------------------------------------------------------------------|--------------------|-------------|----------------------------|------------------------|------------------------|----------|
|                                                                                                | Advanced           | Novice      |                            |                        | Advanced               | Novice   |
| to define the important components of my course                                                | 4.91 (0.3)         | 2.06 (1.2)  | 8**                        | 0.001                  | 5 (0, 1)               | 2 (2, 4) |
| to define my course is terms of student learning outcomes                                      | 4.82 (0.4)         | 4.47 (0.71) | 114                        | 0.5                    | 5 (0, 1)               | 5 (1, 2) |
| to define my course in terms of student competencies                                           | 4.18 (0.87)        | 4.41 (0.71) | 100.5                      | 0.2                    | 4 (1, 3)               | 5 (1, 2) |
| to design formative assessments                                                                | 4.45 (0.52)        | 2.59 (1.12) | 39.5**                     | 0.001                  | 4 (1, 1)               | 2 (2, 4) |
| to design summative assessments                                                                | 4.55 (0.52)        | 2.76 (1.25) | 24**                       | 0.001                  | 5 (1, 1)               | 3 (3, 4) |
| to evaluate the quality of the assessments I have designed                                     | 4.36 (1.02)        | 2.88 (1.36) | 57**                       | 0.009                  | 5 (1, 3)               | 3 (3, 4) |
| to analyze the formative assessments I have designed                                           | 4.27 (0.64)        | 2.59 (0.43) | 48.5**                     | 0.002                  | 4 (1, 2)               | 2 (2, 4) |
| to analyze the summative assessments I have designed                                           | 4.45 (0.52)        | 2.88 (1.21) | 34**                       | 0.001                  | 4 (1, 1)               | 3 (2, 4) |
| to provide students with relevant feedback based on the formative assessments I have designed. | 4.45 (0.52)        | 3.06 (1.29) | 49.5**                     | 0.003                  | 4 (1, 1)               | 3 (2, 4) |
| to explain to specific students the outcomes of their summative assessment performance         | 4.55 (0.68)        | 2.71 (1.26) | 27**                       | 0.001                  | 5 (1, 2)               | 3 (3, 4) |
| to report assessment outcomes to administrators                                                | 4.36 (0.92)        | 2.94 (1.39) | 53.5                       | 0.005                  | 5 (1, 3)               | 3 (3, 4) |
| I am confident that my assessments accurately reflect the teaching objectives of my course     | 4.36 (0.5)         | 2.65 (1.27) | 26**                       | 0.001                  | 4 (1, 1)               | 3 (3, 4) |
| Overall I am confident in my abilities to appropriately assess my course and my students       | 4.45 (0.52)        | 2.82 (1.33) | 43.5**                     | 0.001                  | 4 (1, 1)               | 3 (2, 4) |

**Appendix Table C.** Statistical indicators for data set corresponding to Figure 1 in Hanauer & Bauerle, 2014. Mean, Standard Deviation (S.D.) and significance values for faculty responses to *Attitude toward Assessment* queries; median, range (R) and interquartile range (IQR) values are also included for Advanced (n = 11) and Novice (n = 17) responses.

| Attitude toward Assessment                                        | Mean (S.D.) |             | Mann-Whitney U Test | Two-tailed Sig. | Median (IQR, R) |          |
|-------------------------------------------------------------------|-------------|-------------|---------------------|-----------------|-----------------|----------|
|                                                                   | Advanced    | Novice      |                     |                 | Advanced        | Novice   |
| using assessment in your course                                   | 4.55 (0.68) | 3.06 (1.34) | 52**                | 0.003           | 5 (1, 2)        | 3 (2, 4) |
| reporting to faculty on assessments of your class                 | 4.45 (0.68) | 3.88 (0.85) | 102                 | 0.2             | 5 (1, 2)        | 4 (2, 2) |
| reporting to administration on assessments of your class          | 4.09 (0.94) | 3.76 (0.75) | 114.5               | 0.5             | 4 (2, 2)        | 4 (1, 2) |
| providing feedback to your students based on formative assessment | 4.55 (0.68) | 3.12 (1.21) | 41.5**              | 0.001           | 5 (1, 2)        | 3 (2, 4) |
| providing feedback to students based on summative assessment      | 4.64 (0.67) | 3.82 (0.88) | 60.5**              | 0.009           | 5 (1, 2)        | 4 (2, 2) |
